# Supplementary material for: Transcatheter versus Isolated Surgical Aortic Valve Replacement in Young High-Risk Patients: A Propensity Score-Matched Analysis
Source: MDPI journal article supplement (doi:10.3390/jcm10153447), 2021-08-03
Supplement: s1 [file s1]

**Supplementary Table S1.** Baseline clinical characteristics of the excluded cohorts

|                                                | Excluded after PSM<br>n = 548 |        | iSAVR < 75 years<br>n = 532 |        | TAVR < 75 years<br>n = 16 |        |
|------------------------------------------------|-------------------------------|--------|-----------------------------|--------|---------------------------|--------|
| Demographics                                   |                               |        |                             |        |                           |        |
| Age, mean-(±SD)                                | 68.8                          | (5.6)  | 62.8                        | (10.0) | 69.6                      | (4.2)  |
| Female, n-(%)                                  | 215                           | (39.2) | 204                         | (38.3) | 11                        | (68.8) |
| Body mass index kg/m2, median-(IQR)            | 28.8                          | (5.8)  | 28.6                        | (5.5)  | 29.5                      | (5.3)  |
| Risk profile                                   |                               |        |                             |        |                           |        |
| EuroSCORE II, median (IQR)                     | 4.6                           | (3.5)  | 1.5                         | (1.8)  | 13.4                      | (6.7)  |
| Chronic health conditions and risk factors     |                               |        |                             |        |                           |        |
| Hypertension, n (%)                            | 423                           | (77.2) | 411                         | (77.3) | 12                        | (75.0) |
| Dyslipidaemia, n (%)                           | 350                           | (63.9) | 338                         | (63.5) | 12                        | (75.0) |
| Diabetes mellitus, n (%)                       | 43                            | (7.8)  | 39                          | (7.3)  | 4                         | (25.0) |
| Active smoker, n (%)                           | 171                           | (31.2) | 165                         | (31.0) | 6                         | (37.5) |
| Serum creatinine mg/dL, mean (±SD)             | 1.3                           | (0.8)  | 1.0                         | (0.3)  | 2.4                       | (2.2)  |
| Preoperative dialysis, n (%)                   | 3                             | (0.5)  | 0                           | (0)    | 3                         | (18.8) |
| Chronic obstructive pulmonary disease, n (%)   | 139                           | (25.3) | 127                         | (22.8) | 12                        | (75.0) |
| Peripheral vascular disease, n (%)             | 39                            | (7.1)  | 29                          | (5.5)  | 10                        | (62.5) |
| Cerebrovascular disease, n (%)                 | 83                            | (15.2) | 78                          | (14.7) | 5                         | (31.3) |
| Previous cerebrovascular accident, n (%)       | 4                             | (0.7)  | 3                           | (0.6)  | 1                         | (6.3)  |
| Atrial fibrillation, n (%)                     | 92                            | (16.8) | 87                          | (16.4) | 5                         | (31.3) |
| Previous myocardial infarction, n (%)          | 31                            | (5.7)  | 27                          | (5.1)  | 4                         | (25.0) |
| New York Heart Association class III/IV, n (%) | 253                           | (46.2) | 237                         | (44.6) | 16                        | (100)  |
| Previous PCI, n (%)                            | 25                            | (4.7)  | 22                          | (4.1)  | 3                         | (18.8) |

|                                                         |             |             |             |
|---------------------------------------------------------|-------------|-------------|-------------|
| Previous pacemaker implantation, n (%)                  | 16 (2.9)    | 12 (2.3)    | 4 (25.0)    |
| Previous cardiac surgery, n (%)                         | 22 (4.0)    | 10 (1.9)    | 12 (75.0)   |
| Previous CABG, n (%)                                    | 8 (1.6)     | 2 (0.4)     | 6 (37.5)    |
| Previous valve surgery, n (%)                           | 14 (2.6)    | 6 (1.3)     | 8 (50.0)    |
| Previous other cardiac surgery, n (%)                   | 7 (58.3)    | 31 (0.4)    | 5 (31.3)    |
| <b>Preoperative echocardiographic data</b>              |             |             |             |
| Mean pressure gradient, mean ( $\pm$ SD)                | 47.8 (19.0) | 49.2 (24.3) | 43.7 (17.1) |
| Left ventricular ejection fraction %, mean ( $\pm$ IQR) | 45.8 (12.1) | 53.8 (8.6)  | 41.1 (13.1) |

*CABG – Coronary Artery Bypass Graft; COPD – chronic obstructive pulmonary disease; EuroSCORE - European System for Cardiac Operative Risk Evaluation; IDDM – Insulin dependent diabetes mellitus; IQR – Interquartile range; LVEF - left ventricular ejection fraction; NYHA – New York Heart Association; PSM – propensity score matching; PCI - percutaneous coronary intervention; SD – standard deviation;*

**Supplementary Table S2.** Procedural characteristics of the excluded cohorts

|                                            | Excluded after PSM<br>n = 548 |        | iSAVR < 75 years<br>n = 532 |        | TAVR < 75 years<br>n = 16 |        |
|--------------------------------------------|-------------------------------|--------|-----------------------------|--------|---------------------------|--------|
| Procedural variables                       |                               |        |                             |        |                           |        |
| Biological valve prosthesis, n (%)         | 461                           | (84.1) | 445                         | (83.6) | 16                        | (100)  |
| Balloon-expandable THV, n (%)              |                               |        |                             |        | 10                        | (62.5) |
| Prosthesis size in mm, mean (±SD)          | 26.0                          | (2.5)  | 22.8                        | (3.2)  | 25.4                      | (2.6)  |
| Full sternotomy, n (%)                     |                               |        | 428                         | (80.5) |                           |        |
| Cross-clamp time, mean (±SD)               |                               |        | 67.3                        | (23.4) |                           |        |
| Perfusion time, mean (±SD)                 |                               |        | 99.2                        | (42.9) |                           |        |
| Transfemoral access, n (%)                 |                               |        |                             |        | 13                        | (81.3) |
| Predilatation, n (%)                       |                               |        |                             |        | 5                         | (31.3) |
| Postdilatation, n (%)                      |                               |        |                             |        | 4                         | (25)   |
| Paravalvular leak > mild, n (%)            | 0                             | (0)    | 0                           | (0)    | 0                         | (0)    |
| Postoperative circulatory support, n (%)   | 4                             | (0.7)  | 3                           | (0.6)  | 1                         | (6.3)  |
| Extubated in the OR, n (%)                 | 4                             | (0.7)  | 0                           | (0)    | 4                         | (25)   |
| Total hours ventilated, median (±IQR)      | 5                             | (9)    | 8                           | (8)    | 4                         | (8)    |
| Re-intubated during hospital stay, n (%)   | 15                            | (2.7)  | 15                          | (2.8)  | 0                         | (0)    |
| Number of red blood cell units, mean (±SD) | 0.9                           | (2.6)  | 1.0                         | (3.0)  | 0                         | (0)    |
| Length of stay, median (±IQR)              | 10                            | (8)    | 11                          | (5)    | 10                        | (13)   |

OR - operating room; THV - transcatheter heart valves; other abbreviations as in Supplementary table 1

**Supplementary Table S3.** Adverse events of the excluded cohorts

|                                                | Excluded after PSM<br>n = 548 | iSAVR < 75 years<br>n = 532 | TAVR < 75 years<br>n = 16 |
|------------------------------------------------|-------------------------------|-----------------------------|---------------------------|
| <b>Procedural variables</b>                    |                               |                             |                           |
| Myocardial infarction, n (%)                   | 1 (0.2)                       | 1 (0.2)                     | 0 (0)                     |
| Neurological adverse event, n (%)              | 4 (0.7)                       | 4 (0.8)                     | 0 (0)                     |
| Major vascular complication, n (%)             | 1 (0.2)                       | 0 (0)                       | 1 (6.3)                   |
| Major bleeding complication, n (%)             | 19 (3.5)                      | 18 (3.4)                    | 1 (6.3)                   |
| Postoperative renal replacement therapy, n (%) | 6 (1.1)                       | 6 (1.1)                     | 0 (0)                     |
| New-onset atrial fibrillation, n (%)           | 65 (11.9)                     | 65 (12.2)                   | 0 (0)                     |
| AV-Block III, n (%)                            | 16 (2.9)                      | 13 (2.4)                    | 3 (18.8)                  |
| Pacemaker implantation, n (%)                  | 16 (2.9)                      | 13 (2.4)                    | 3 (18.8)                  |
| Reoperation for valvular dysfunction, n (%)    | 1 (0.2)                       | 1 (0.2)                     | 0 (0)                     |
| Reoperation for bleeding/tamponade, n (%)      | 11 (2.0)                      | 11 (2.1)                    | 0 (0)                     |
| Reoperation for other cardiac problem, n (%)   | 2 (0.4)                       | 1 (0.2)                     | 1 (6.3)                   |
| Reoperation for non-cardiac problem, n (%)     | 10 (1.8)                      | 10 (1.9)                    | 0 (0)                     |
| Postoperative sepsis, n (%)                    | 2 (0.4)                       | 2 (0.4)                     | 0 (0)                     |
| Deep sternal wound infection, n (%)            | 5 (0.9)                       | 5 (0.9)                     | 0 (0)                     |
| Prolonged ventilation >6hrs, n (%)             | 44 (8.0)                      | 43 (8.1)                    | 1 (6.3)                   |
| Multi-system organ failure, n (%)              | 5 (0.9)                       | 5 (0.9)                     | 0 (0)                     |
| In-hospital death, n (%)                       | 6 (1.1)                       | 6 (1.3)                     | 0 (0)                     |
| 30-day all-cause mortality, n (%)              | 8 (1.6)                       | 7 (1.3)                     | 1 (6.3)                   |

AV – atrioventricular; other abbreviations as in Supplementary table 1, 2 and 3
